# Supplementary material for: Heterozygous loss-of function variants in DOCK4 cause neurodevelopmental delay and microcephaly
Source: Research Square preprint supplement (doi:10.21203/rs.3.rs-3579921/v1), 2023-11-14
Supplement: Supplementary file 1 [file bc3fde21d8fae4302e1db7f3.xlsx]

## Sheet: table S1
Individual	Procentual portion of certain phenotypes in the cohort	1	2	3	4	5	6	7	8	F1	9	10	11	12	13	14	15
											PMID: 33057194; GDX_1030	PMID: 33057194; GDX_54555	PMID: 33057194; GDX_67215	PMID: 33057194; rumc_patient_2014	PMID: 25363768	PMID: 26785492	PMID: 20346443
Variant information
Genomic position (GRCh37) allele 1		7:111451991:G:A	7:111448912:A:G	7:111430628:A:G	7:111400359:C:T	7:111368345:C:A	7:111580250:G:A	7:111474709:G:A	7:111405256:TC:T	7:111448918:A:G	7:111629139C:T	7:111400236C:A	7:111509704T>C	7:111400254A:T	7:111398732:C:T	7:111540528:T:C	7:110663978-111257682
Variant cDNA level allele (NM_014705.4) 1		c.2945C>T	c.3131T>C	c.3200T>C	c.4013G>A	c.5886G>T	c.892C>T	c.2770C>T	c.3910del	c.3125T>C	c.395G>A	c.4135+1G>T	c.2035A>G	c.4145T>A	c.4250G>A	c.1382A>G
Variant protein level allele 1		p.Thr982Ile	p.Met1044Thr	p.Ile1067Thr	p.Arg1338Gln	p.Lys1962Asn	p.Arg298*	p.Arg924*	p.Asp1304Thrfs*27	p.Val1042Ala	p.Gly132Asp	p.?	p.Ile679Val	p.Phe1373Tyr	p.Arg1417His	p.His461Arg	p.Asp946_Lys1966delinsValSer*
inheritence allele 1		de novo	de novo	de novo	de novo	unknown (adopted)	maternal	not maternal	maternal	maternal	de novo	de novo	de novo	de novo	de novo	de novo
gnomAD Ex Freq (count) (PMID: 32461654) variant 1		0	0	0	0.000004017 (1)	0	0	0	0	0
CADD (phred) (PMID: 33618777) variant 1		32	25.9	24.1	32	24	38	41	N/A	24.7	28.3	32	25.1	22.8	24	25.7
MutPred2 (PMID: 33219223) variant 1		0.908	0.898	0.613	0.787	0.554	N/A	N/A	N/A	0.704	0.684	spliceAI (PMID: 30661751): 0.28	0.350	0.186	0.559	0.831
REVEL (PMID: 27666373) variant 1		0.267	0.239	0.6259	0.365	0.186	N/A	N/A	N/A	0.428	0.57		0.144	0.277	0.342	0.577
ACMG criteria variant 1		PM2_SUP, PS2_MOD, PP3, PS3_MOD, PM1_SUP	PM2_SUP, PS3_MOD, PP3, PS2_MOD, PM1_SUP	PM2_SUP, PS2_MOD, PS3_MOD, PM1_SUP	PS2_MOD, PP3, PM1_SUP	PM2_SUP, PS3_MOD, PM1_SUP	PVS1, PM2_SUP	PVS1, PM2_SUP	PVS1, PM2_SUP	PM2_SUP, PS3_MOD, PM1_SUP
ACMG classification variant 1		likely pathogenic	likely pathogenic	likely pathogenic	unclear Significance	unclear Significance	likely pathogenic	likely pathogenic	likely pathogenic	unclear Significance
Genomic position (GRCh37) allele 2			7:111585797:G:A							7:111541792:C:T
Variant cDNA level allele (NM_014705.4) 2			c.758C>T							c.1258G>A
Variant protein level allele 2			p.Pro253Leu							p.Val420Met
inheritence allele 2			paternal							paternal
gnomAD Ex Freq (het count) (PMID: 32461654) variant 2			0.0003361 (86)							0.00004020 (10)
CADD (phred) (PMID: 33618777) variant 2			22.1							27.2
MutPred2 (PMID: 33219223) variant 2			0.496							0.542
REVEL (PMID: 27666373) variant 2			0.37							0.277
ACMG criteria variant 2			PS3_MOD							PP3, PS3_MOD, PM1_SUP
ACMG classification variant 2			unclear Significance							unclear Significance
General information
Age at last examination in years		14y 8m	5 y	5 y	3 y 11 m	12 y	6 y	20 y	4 y 8 m	24 gestational weeks (fetus)
Sex		male	male	male	male	male	male	female	male	male					male
Neurological abnormalities
Intellectual disability	71%; 5/7	yes (moderate - severe)	yes (mild-moderate, IQ50)	no	yes (severe)	yes (moderate)	yes (mild)	no (global learning difficulties)	N/A	not applicable					borderline (verbal IQ:77, non-verbal IQ: 89)		no (dyslexia)
Speech delay	75% 6/8	no	yes	no	yes	yes (severe)	yes	yes (mild)	yes (moderate)	not applicable		yes	yes	yes	yes	yes	yes
Motor developmental delay	88% 7/8	no	yes	yes (motor delay at 9 months, but not evident at 6 years)	yes	yes (severe)	yes	yes (mild)	yes (moderate)	not applicable		yes	yes	yes	yes	yes
Developmental milestones		unremarkable development before onset of seizures		On Time		unknown (adopted)			spoke at 3 y, walks with walker at 2-3 y	not applicable
Autism/autism-like behavior	29%, 2/7	no	no	no	N/A	yes	yes	no	no	not applicable							yes
Other behavioral problems		no	no	no	N/A	deficits in social-emotional reciprocity; poor eye contact; limited speech, ADHD		attention disorder, anxiety		not applicable
Seizures	43%, 3/7	first onset of generalized tonic-clonic seizures in 4y of age, Seizure regression under LPA treatmnet	N/A	no	no	yes	no	no	Paroxysmal events with abnormal EEG consistent with focal onset and localization related epilepsy capturing epileptogenicity in multiple midline regions. Background indicated a mild, non-specific, generalized cerebral dysfunction.	not applicable
cranial MRI	57%; 4/7	unremarkable	mild cerebellar ectopia	On MRI - volume loss in left periventricular region, extending into basal ganglia and even part of brainstem, with thinning of the corpus callosum and suggestion of incomplete myelination in surrounding areas.	unremarkable	left posterolateral positional plagiocephaly, enlarged bilateral subarachnoid spaces, sulci, and borderline-enlarged lateral and third ventricles, most consistent with mild diffuse cerebral atrophy, minimal white matter gliosis, nonspecific (minimal amount of gliosis might be considered within normal limits for patient age)	unremarkable	N/A	bilateral cerebral hemispheric white matter volume loss and gliosis.	rhombencephalosynapsis, microlissencephaly
Hypotonia	60%; 3/5	no	yes	no	N/A	yes, generalized	N/A	N/A	yes, truncal	not applicable
Coordination or gait abnormalities	71%; 5/7	tremor, ataxia	ataxia, spasticity in legs	Right sided spastic hemiplegia with some dystonia	N/A	Dystonia, periodic episodes of unilateral extremity weakness and lethargy	no	no	cerebral palsy with truncal hypotonia and increased axial tone	not applicable
Dysmorphic features	57%; 4/7	N/A	wide/low nasal bridge, full cheeks, and narrow forehead	no	no	mild brachycephaly, relative macrocephaly, hypertelorism, arched eyebrows narrow, upslanting palpebral fissures, depressed nasal bridge, unremarkable appearance of eyelashes, scalp hair texture and distribution.	thick eyebrows, ichtyosis , fifth finger clinodactyly	no	downturned corners of the mouth, single palmar creases, inverted nipples	no
Microcephaly	50%, 3/6	N/A	yes	no	yes	no	yes	N/A	no	yes
Ophthalmologic abnormalities	50%, 4/8	no	amblyopia	no	no	astigmatism, myopia	no	strabismus	esotropia
Other Symptoms						EEG indicative of focal cerebral dysfunction complex partial seizures, Atopic dermatitis, Chronic constipation	blinking	glossodynia								hypoplastic left heart syndrome, mitral atresia, aortic atresia
Other information				likely pathogenic variant in COL4A1 (c.607G>A;p.G203R, paternal)	head control - incomplete, roll over - incomplete, sit with support - none, grasp - none		mother cliniclal unremarkable, on microarray XP22.31 microdeletion consistent with ichthyosis	symptomatic mother and symptomatic sister do not carry the variant. The mother had learning difficulties, reading difficulties and attention disorder. The sister had mild psychomotor delay (walking at 2 years, speech delay) and learning difficulties, reading difficulties, memory deficit, anxiety, stable tremor without cerebellar involvement.	mother reaffirms she is healthy – no issues of seizures, developmental concerns, etc. She has some hypertension now but otherwise healthy; unremarkable microarray, unremarkablel SMA testing. Nuclear Genome sequencing otherwise unrevealing, mitochondrial genome sequencing showed a homoplasmic MT-CO3 m.9909T>C,p.F235L variant of unknown significance								in total eight individuals of one family were assesed. See Discussion for details

## Sheet: tableS2
fragment	forward primer 5'-3'	reverse primer 5'-3'
pcDNA3.1_mRFP	CCCTGCCCCGCAAGGTCTCTCAGTTACATCTAGAGGCCTCCTCCGAGGACGTCATCAAGG	CGTATTTCTCGTGCTCCGTAGGTATCCACATGGTGGCTCGAGCGGCCGCCAGTGTGATGG
DOCK4_1	CCATCACACTGGCGGCCGCTCGAGCCACCATGTGGATACCTACGGAGCACGAGAAATACG	TCCTTTCTCCTTTGTGGAACAAtGCCGAAACTCGAAGCGGATGTG
DOCK4_2	CACATCCGCTTCGAGTTTCGGCATTGTTCCACAAAGGAGAAAGGA	CAGGAGACAAGCAACAAACTCCCCAGTGACATCCTGGAACTGGAACCGCATTG
DOCK4_3	CAATGCGGTTCCAGTTCCAGGATGTCACTGGGGAGTTTGTTGCTTGTCTCCTG	TAGGAATCCCAGATCTTATAATCAAAGTTTTCATTTAAGAAGTTCTTACG
DOCK4_4	CGTAAGAACTTCTTAAATGAAAACTTTGATTATAAGATCTGGGATTCCTA	GTTTCCCGCTCAATTTTCTTTAGTAGAATACTGTTGAAGAGCTCGCGGTATG
DOCK4_5	CATACCGCGAGCTCTTCAACAGTATTCTACTAAAGAAAATTGAGCGGGAAAC	CCTTGATGACGTCCTCGGAGGAGGCCTCTAGATGTAACTGAGAGACCTTGCGGGGCAGGG
